# Supplementary material for: The relative importance of frailty, physical and cardiovascular function as exercise-modifiable predictors of falls in haemodialysis patients: a prospective cohort study
Source: PubMed Central journal article supplement (PMC7071740; doi:10.1186/s12882-020-01759-z), 2020-03-14
Supplement: 12882_2020_1759_MOESM1_ESM.pdf [file 12882_2020_1759_MOESM1_ESM.pdf]

**Table S1.** Multicollinearity analysis: correlations among baroreflex function variables.

| Variables            | 1      | 2      | 3      | 4      | 5      | 6      | 7      |
|----------------------|--------|--------|--------|--------|--------|--------|--------|
| 1. Up-events (n°)    | 1.000  | .808** | .931** | .948** | .620** | .775** | -.265* |
| 2. Down-events (n°)  | .808** | 1.000  | .948** | .773** | .830** | .812** | -.185  |
| 3. Total-events (n°) | .931** | .948** | 1.000  | .875** | .775** | .838** | -.268* |
| 4. Up-BEI (%)        | .948** | .773** | .875** | 1.000  | .642** | .816** | -.256  |
| 5. Down-BEI (%)      | .620** | .830** | .775** | .642** | 1.000  | .931** | -.297* |
| 6. Total-BEI (%)     | .775** | .812** | .838** | .816** | .931** | 1.000  | -.324* |
| 7. Falls (n°)        | -.265* | -.185  | -.268* | -.256  | -.297* | -.324* | 1.000  |

**Abbreviations:** Up-BEI: up-events baroreceptor effectiveness index; Down-BEI: down-events baroreceptor effectiveness index; Total-BEI: total-events baroreceptor effectiveness index; \* indicates a significant correlation (p-value < .05); \*\* indicates a significant correlation (p-value < .01).

**Table S2.** Negative binomial regression analysis: sensitivity analyses.

| Factors                                | Univariate        |         | Multivariate     |         |                  |         |
|----------------------------------------|-------------------|---------|------------------|---------|------------------|---------|
|                                        | RR (95% CI)       | P-value | Model 1          |         | Model 2          |         |
|                                        | RR (95% CI)       | P-value | RR (95% CI)      | P-value | RR (95% CI)      | P-value |
| <b>Frailty &amp; physical function</b> |                   |         |                  |         |                  |         |
| Frailty (yes/no)                       | 4.10 (1.60-10.51) | 0.003   | 1.87 (0.74-4.76) | 0.187   | 1.58 (0.63-3.99) | 0.330   |
| Daily steps (n°)                       | 0.99 (0.99-1.00)  | 0.006   | 1.00 (0.99-1.00) | 0.575   | 1.00 (0.99-1.00) | 0.686   |
| Daily sit to stands (n°)               | 0.96 (0.93-0.99)  | 0.042   | 1.01 (0.97-1.06) | 0.647   | 1.03 (0.97-1.08) | 0.328   |
| Handgrip (Kg)                          | 0.94 (0.88-0.99)  | 0.034   | 0.96 (0.91-1.01) | 0.096   | 0.96 (0.91-1.01) | 0.142   |
| Gait speed (m/s)                       | 0.08 (0.01-0.62)  | 0.016   | 0.39 (0.05-2.95) | 0.361   | 0.50 (0.05-4.59) | 0.537   |
| TUG (s)                                | 1.16 (1.02-1.32)  | 0.021   | 1.06 (0.95-1.19) | 0.299   | 0.02 (0.90-1.15) | 0.817   |
| <b>Cardiovascular function</b>         |                   |         |                  |         |                  |         |
| Total-BEI (%)                          | 0.96 (0.93-0.98)  | <0.001  | 0.97 (0.95-0.99) | 0.020   | 0.97 (0.95-0.99) | 0.020   |
| CO (L/min)                             | 0.51 (0.27-0.98)  | 0.043   | 0.65 (0.40-1.06) | 0.084   | 0.68 (0.43-1.07) | 0.098   |
| OscDBP (mmHg)                          | 0.90 (0.83-0.98)  | 0.010   | 0.96 (0.88-1.04) | 0.344   | 0.99 (0.91-1.07) | 0.736   |

**Abbreviations:** RR: rate ratio; CI: confidence interval; TUG: timed up and go test; Total-BEI: total-events baroreceptor effectiveness index; CO: cardiac output response to HUT-60°; OscDBP:

oscillometric diastolic blood pressure response to HUT-60°; Model 1: All factors are adjusted for diabetic status and antidepressant use; Model 2: Frailty and physical function factors are adjusted for all variables in Model 1 and for Total-BEI. Cardiovascular function factors are adjusted for all variables in Model 1 and for frailty.
